# Supplementary material
Source: HighWire-hosted journal article supplement (https://sit.bmj.com/highwire/filestream/357/field_highwire_adjunct_files/3/bmjsit-2020-000071supp004_data_supplement.pdf)
Supplement: bmjsit-2020-000071supp004_data_supplement.pdf [file bmjsit-2020-000071supp004_data_supplement.pdf]

**Table S4: Summary of Expected cost, Expected QALY and associated Incremental Cost Effectiveness Ratio (ICER) values for PAE and TURP (values to 2 d.p.)**

|                                                          | Cost-utility analysis          |                                                                   | Sensitivity Analysis 1         | Sensitivity Analysis 2           | Sensitivity Analysis 3           |
|----------------------------------------------------------|--------------------------------|-------------------------------------------------------------------|--------------------------------|----------------------------------|----------------------------------|
| Cost <sub>PAE</sub> (£ per patient)                      | 2,000                          | Expected Cost <sub>PAE</sub> (£ per patient)                      | 2,009.50                       | 2,009.50                         | 2306.46                          |
| Cost <sub>TURP</sub> (£ per patient)                     | 3,028                          | Expected Cost <sub>TURP</sub> (£ per patient)                     | 3,067.14                       | 3,067.14                         | 3958.96                          |
| QALY <sub>PAE</sub>                                      | 0.96                           | Expected QALY <sub>PAE</sub>                                      | 0.96                           | 0.94                             | 0.94                             |
| QALY <sub>TURP</sub>                                     | 0.98                           | Expected QALY <sub>TURP</sub>                                     | 0.98                           | 0.91                             | 0.91                             |
| Difference in Cost between interventions (£ per patient) | -1,028                         | Difference in Expected Cost between interventions (£ per patient) | - 1,057.64                     | - 1,057.64                       | - 1,652.51                       |
| Difference in QALY between interventions                 | -0.02                          | Difference in Expected QALY between interventions                 | -0.02                          | 0.03                             | 0.03                             |
| Incremental Cost Effectiveness Ratio                     | £64,798.10 saved per QALY lost | Incremental Cost Effectiveness Ratio                              | £52,445.86 saved per QALY lost | £32,960.33 saved per QALY gained | £51,498.80 saved per QALY gained |
